# Supplementary material for: Structural insight into substrate recognition by the endoplasmic reticulum folding-sensor enzyme: crystal structure of third thioredoxin-like domain of UDP-glucose:glycoprotein glucosyltransferase
Source: PubMed Central journal article supplement (PMC4255179; doi:10.1038/srep07322), 2014-12-04
Supplement: srep07322-s1.pdf [file srep07322-s1.pdf]

## **Supplementary information**

### **Structural insight into substrate recognition by the endoplasmic reticulum folding-sensor enzyme: crystal structure of third thioredoxin-like domain of UDP-glucose:glycoprotein glucosyltransferase**

Tong Zhu<sup>1,2,3</sup>, Tadashi Satoh<sup>3,4</sup> and Koichi Kato<sup>1,2,3</sup>

<sup>1</sup>School of Physical Sciences, The Graduate University for Advanced Studies, 5-1 Higashiyama, Myodaiji, Okazaki, Aichi 444-8787, Japan; <sup>2</sup>Okazaki Institute for Integrative Bioscience and Institute for Molecular Science, National Institutes of Natural Sciences, 5-1 Higashiyama, Myodaiji, Okazaki, Aichi 444-8787, Japan; <sup>3</sup>Graduate School of Pharmaceutical Sciences, Nagoya City University, 3-1 Tanabe-dori, Mizuho-ku, Nagoya 467-8603, Japan; <sup>4</sup>JST, PRESTO, 3-1 Tanabe-dori, Mizuho-ku, Nagoya 467-8603, Japan;



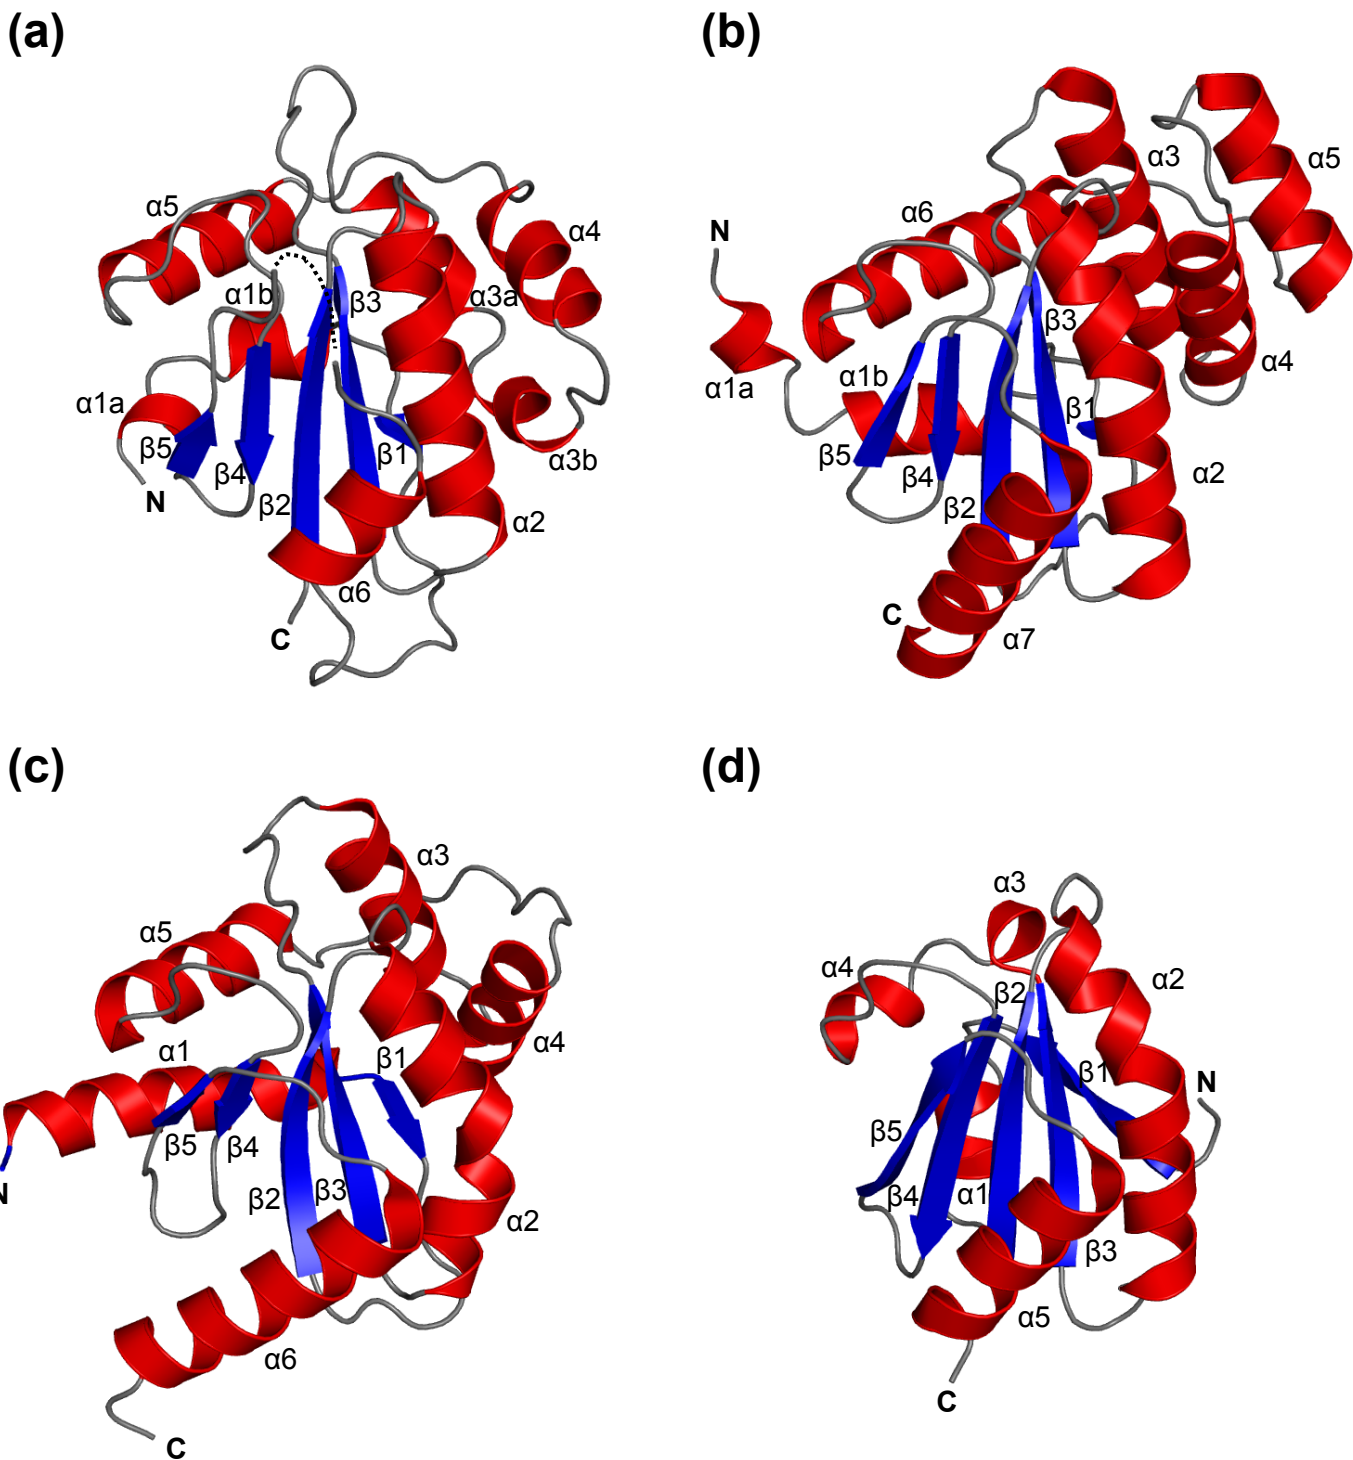

**Fig. S2. Comparison of the Trx3 domain with homologous structures.** (a) Trx3 domain of *C. thermophilum* UGGT (Form 1). (b) DsbA/C homologue, *Salmonella enterica* ScsC (PDB code: 4GXZ). (c) *E. coli* DsbC (PDB code: 1EEJ). For clarity, the N-terminal dimerization domain (residues 1–60) is not shown in the model. (d) *E. coli* thioredoxin (PDB code: 2TRX). The secondary structures are colored as in Fig. 1.

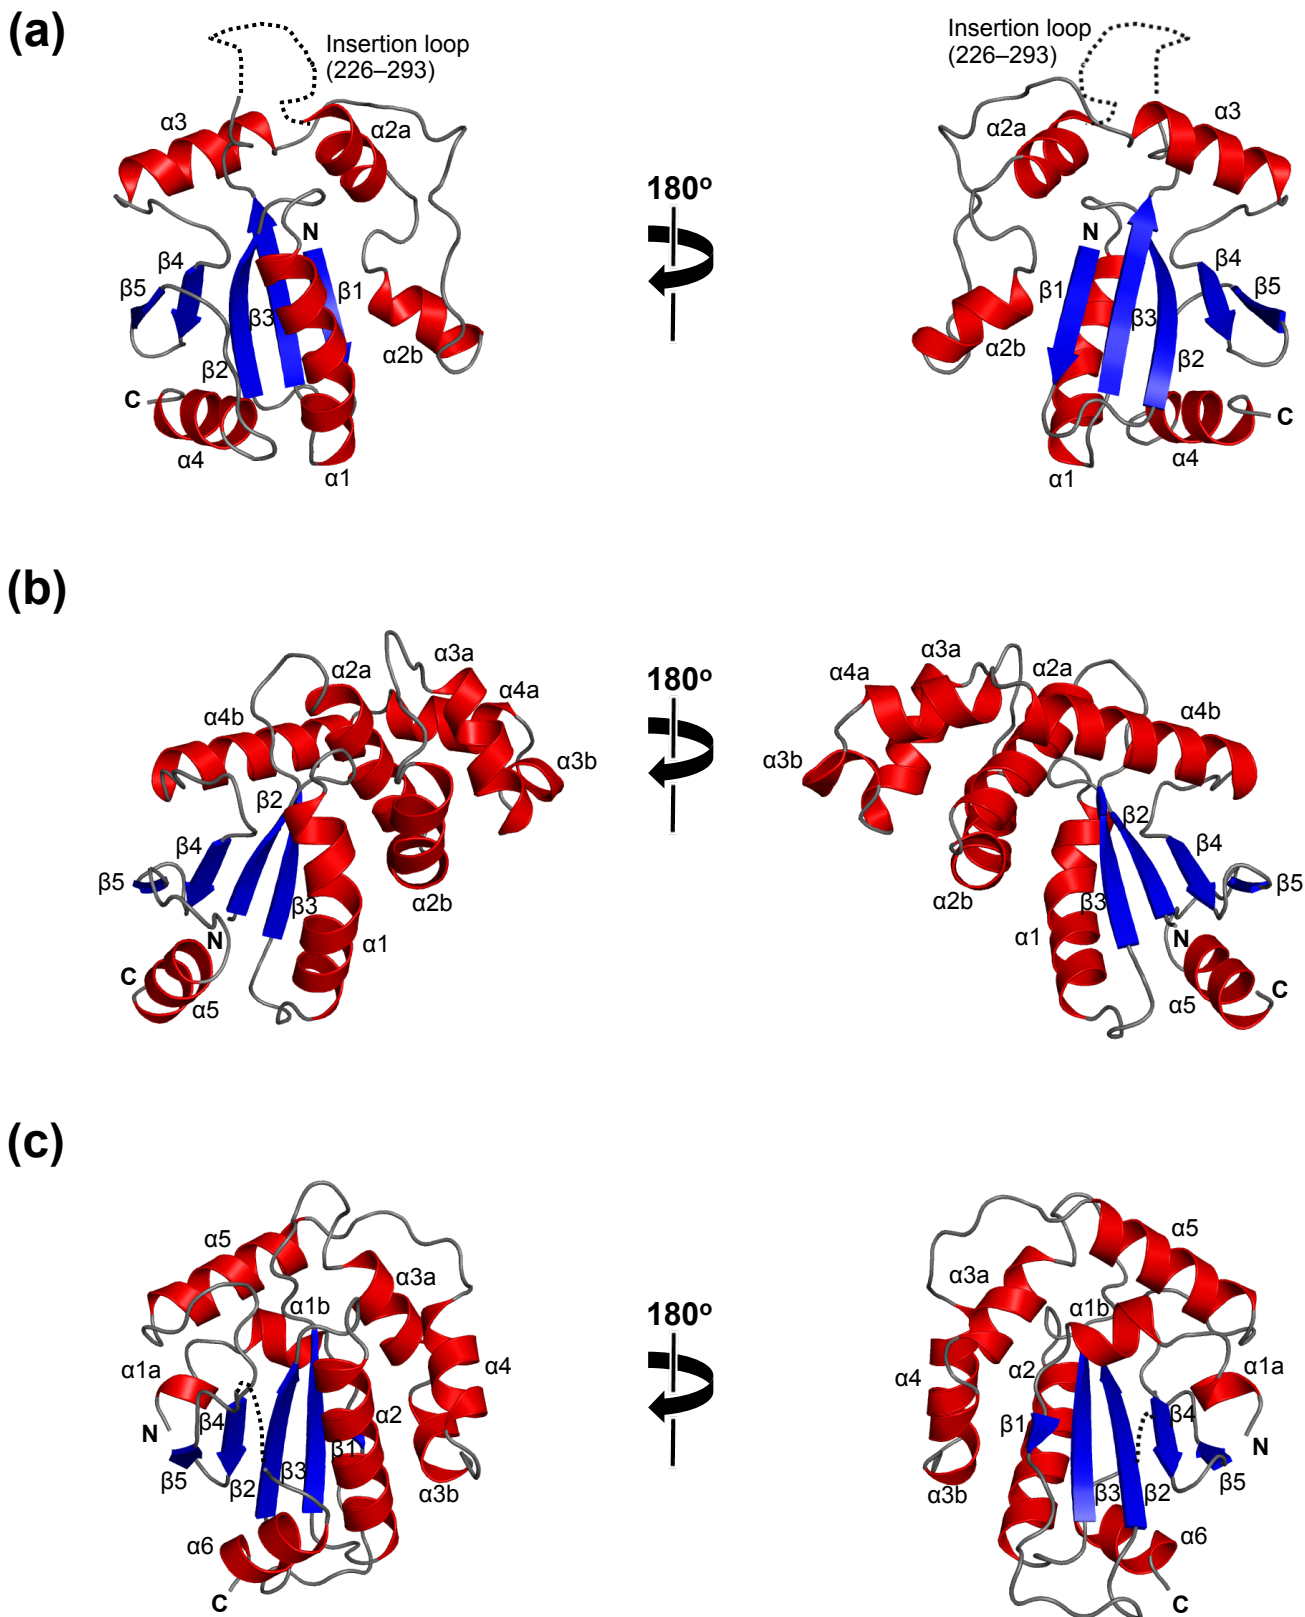

**Fig. S3. Comparison of the overall structures of Trx-like domains in UGGT.** (a) Homology model of the Trx1 domain (residues 168–379). An insertion loop (residues 226–293) is shown in dashed line. (b) Homology model of the Trx2 domain (residues 467–624). (c) Crystal structure of the Trx3 domain (residues 671–831, Form 1). The secondary structures are colored as in Fig. 1.

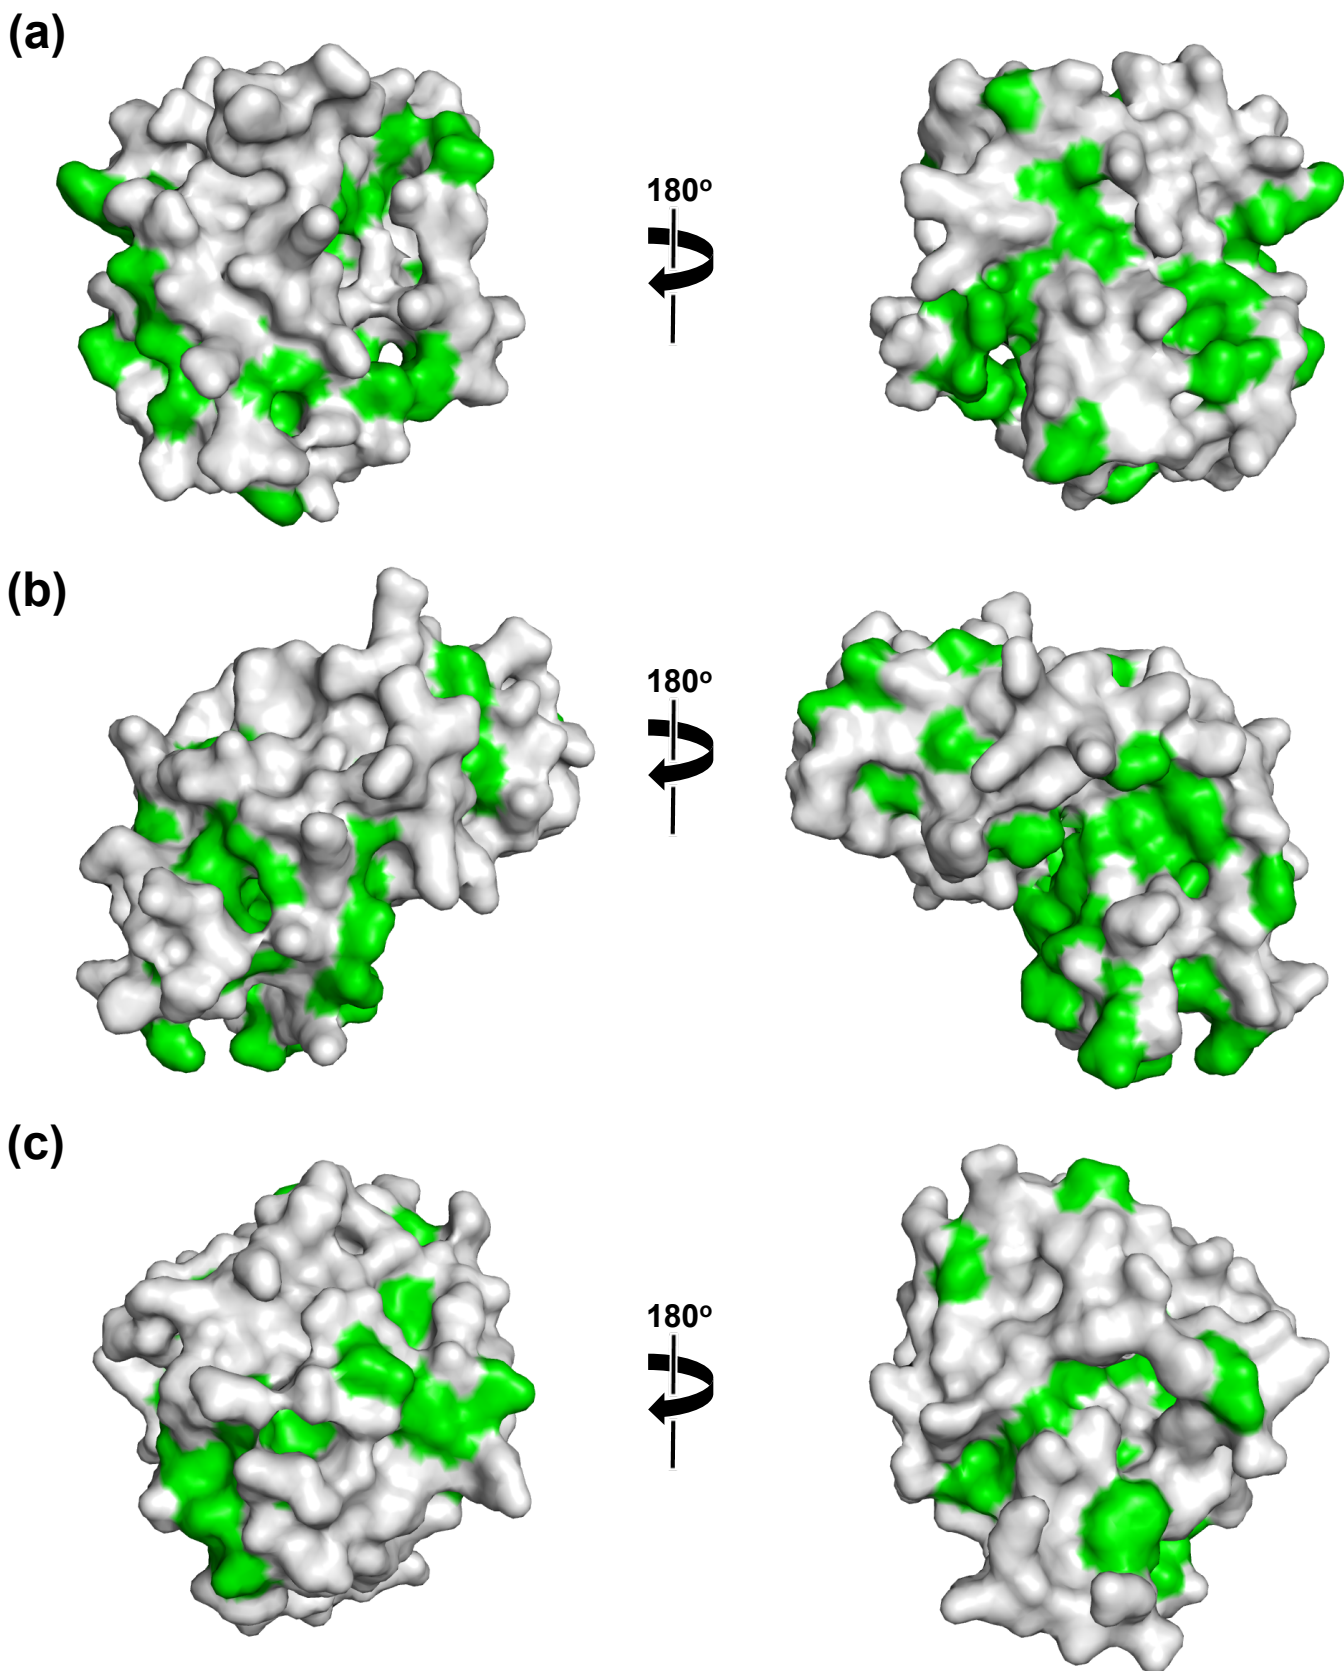

**Fig. S4. Comparison of the Trx-like domains of UGGT in terms of surface hydrophobicity.** (a) Homology model of the Trx1 domain. (b) Homology model of the Trx2 domain. (c) Crystal structure of the Trx3 domain (Form 1). The hydrophobic residues are colored green.

**Table S1. Sequence identity of UGGT among species**

|                                  | <i>Chaetomium thermophilum</i>         | <i>Schizosaccharomyces pombe</i> | <i>Drosophila melanogaster</i> | <i>Homo sapiens</i> |
|----------------------------------|----------------------------------------|----------------------------------|--------------------------------|---------------------|
|                                  | <b>Full-length (28–1509)</b>           |                                  |                                |                     |
| <i>Chaetomium thermophilum</i>   | -                                      | 35.3%                            | 32.0%                          | 34.5%               |
| <i>Schizosaccharomyces pombe</i> | 35.3%                                  | -                                | 31.0%                          | 29.9%               |
| <i>Drosophila melanogaster</i>   | 32.0%                                  | 31.0%                            | -                              | 44.2%               |
| <i>Homo sapiens</i>              | 34.5%                                  | 29.9%                            | 44.2%                          | -                   |
|                                  | <b>Folding sensor region (28–1198)</b> |                                  |                                |                     |
| <i>Chaetomium thermophilum</i>   | -                                      | 26.8%                            | 24.6%                          | 26.7%               |
| <i>Schizosaccharomyces pombe</i> | 26.8%                                  | -                                | 22.6%                          | 20.8%               |
| <i>Drosophila melanogaster</i>   | 24.6%                                  | 22.6%                            | -                              | 37.0%               |
| <i>Homo sapiens</i>              | 26.7%                                  | 20.8%                            | 37.0%                          | -                   |
|                                  | <b>Catalytic domain (1199–1509)</b>    |                                  |                                |                     |
| <i>Chaetomium thermophilum</i>   | -                                      | 67.3%                            | 58.5%                          | 64.0%               |
| <i>Schizosaccharomyces pombe</i> | 67.3%                                  | -                                | 60.7%                          | 63.7%               |
| <i>Drosophila melanogaster</i>   | 58.5%                                  | 60.7%                            | -                              | 73.9%               |
| <i>Homo sapiens</i>              | 64.0%                                  | 63.7%                            | 73.9%                          | -                   |
